# Supplementary material
Source: PubMed Central journal article supplement (PMC4650420)
Supplement: cr2015115x4.pdf [file cr2015115x4.pdf]

# Supplementary Figure 4

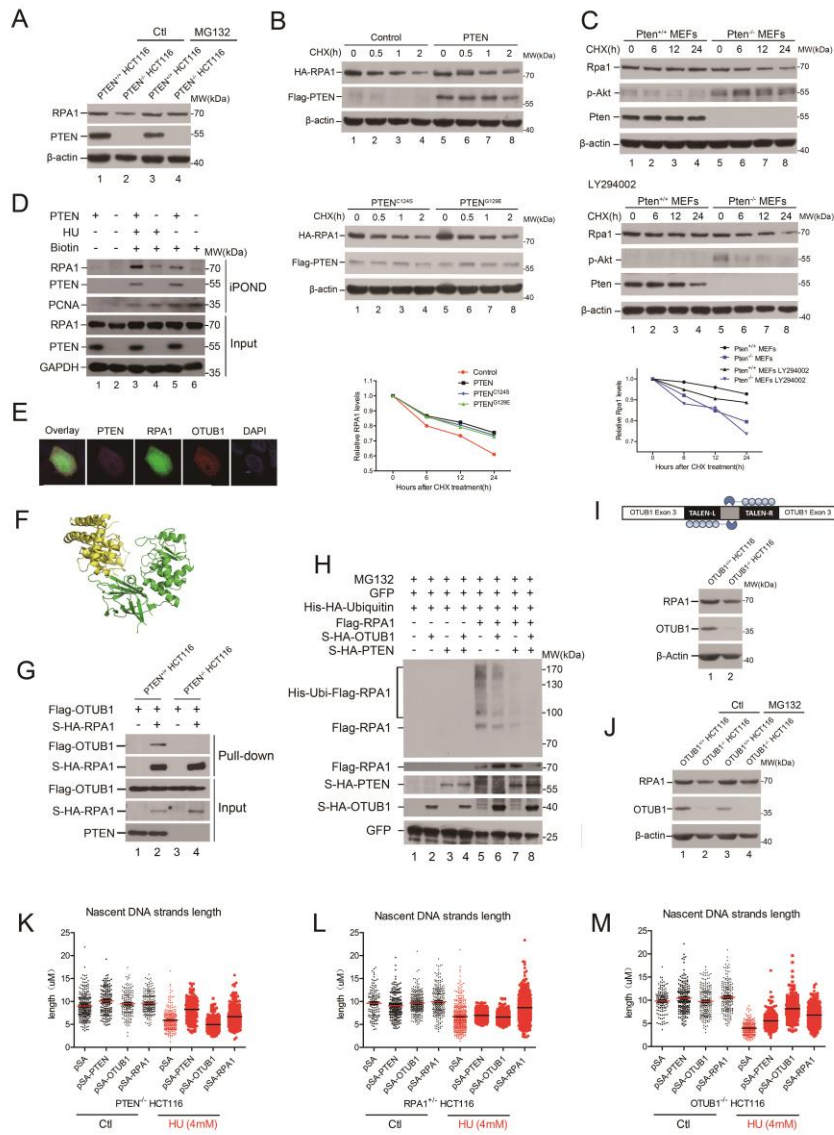

**Supplementary information, Figure S4. RPA1 is stabilized by PTEN/OTUB1 and acts as a downstream target**

**(A)** Protein expression analysis of RPA1 in PTEN null cells. PTEN<sup>+/+</sup> and PTEN<sup>-/-</sup> HCT116 cells were treated with or without MG132 (10  $\mu$ M) for 12 h before collection. Lysates were subjected to western blotting with antibodies against RPA1, PTEN, and  $\beta$ -actin. **(B)** Half-life analysis of RPA1. PTEN<sup>-/-</sup> HCT116 cells were co-transfected with HA-RPA1 and Flag-HA-PTEN, Flag-HA-PTEN<sup>C124S</sup> or Flag-HA-PTEN<sup>G129E</sup>, treated with 100  $\mu$ g/ml CHX, collected at different time points and immunoblotted with antibodies against HA, Flag and  $\beta$ -actin. Quantification of HA-RPA1 protein levels. **(C)** Half-life analysis of RPA1 in PTEN deleted cells with LY294002 (30  $\mu$ M) treatment. *Pten*<sup>+/+</sup> and *Pten*<sup>-/-</sup> MEFs cells were treated with 100  $\mu$ g/ml CHX, collected at different time points and immunoblotted with antibodies against RPA1, p-Akt, PTEN and  $\beta$ -actin. Quantification of RPA1 protein levels in *Pten*<sup>+/+</sup> and *Pten*<sup>-/-</sup> MEFs cells. **(D)** PTEN<sup>+/+</sup> and PTEN<sup>-/-</sup> HCT116 cells were labeled with EdU (15 min) and treated with or without 4 mM HU for 5h. Proteins isolated on biotin conjugated nascent DNA were detected by western blotting. **(E)** Immunofluorescence analysis of co-localization of ectopic PTEN, RPA1 and OTUB1 in PTEN<sup>-/-</sup> HCT116. **(F)** In Silico docking analysis of PTEN and OTUB1 complexes within a distance of 3.0  $\text{\AA}$ . PTEN is represented by green and OTUB1 by yellow. **(G)** *In vivo* binding of exogenous OTUB1 and RPA1 in PTEN<sup>+/+</sup> and PTEN<sup>-/-</sup> HCT116 cells. S-tagged-RPA1 and Flag-OTUB1 were co-transfected in PTEN<sup>+/+</sup> and PTEN<sup>-/-</sup> HCT116 cells. Cell lysates were pulled down with s-protein beads and immunoblotted with the antibody against Flag and other antibodies as indicated.

**(H)** *In vivo* deubiquitination of RPA1. PTEN<sup>-/-</sup> HCT116 cells were co-transfected with S-tagged-HA-PTEN and/or S-tagged-HA-OTUB1 together with His-HA-ubiquitin and Flag-RPA1, then subjected to pull-down assay with Ni-beads and immunoblotted with the antibody against Flag. Cells were treated with MG132 (10 μM) for 12 h prior to collection. **(I)** Experimental design and western blot confirmation of OTUB1 deletion. **(J)** Protein expression analysis of RPA1 in OTUB1 null cells. OTUB1<sup>+/+</sup> and OTUB1<sup>-/-</sup> HCT116 cells were treated with or without MG132 (10 μM) for 12 h before collection. Lysates were subjected to western blotting with antibodies against RPA1, OTUB1 and β-actin. **(K-M)** Measurements of IdU tracts in PTEN<sup>-/-</sup> HCT116 (K), RPA1<sup>+/-</sup> HCT116 (L) and OTUB1<sup>-/-</sup> HCT116 (M) cells transfected with S-tagged-PTEN, S-tagged-RPA1, S-tagged-OTUB1 or S-tagged-mock with or without HU. Data are presented as means ± SEM and analyzed by unpaired t-test.
