# Supplementary material
Source: PubMed Central journal article supplement (PMC4650420)
Supplement: cr2015115x5.pdf [file cr2015115x5.pdf]

## Supplementary Figure 5

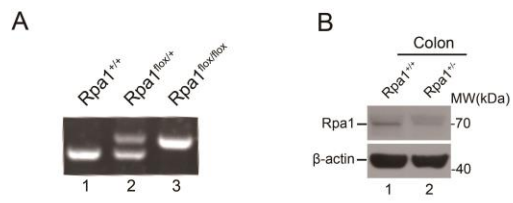

**Supplementary information, Figure S5. Validation of *Rpa1*<sup>+/-</sup> mice**

**(A)** Genotype analysis of *Rpa1*<sup>+/+</sup>, *Rpa1*<sup>fllox/+</sup> and *Rpa1*<sup>fllox/fllox</sup> mice. **(B)** Verification of expression of RPA1 in *Rpa1* heterozygous knockout mice. Colon tissues from *Rpa1*<sup>+/+</sup> and *Rpa1*<sup>+/-</sup> mice were lysed for immunoblotting with the anti-RPA1 antibody.
